# Supplementary material
Source: publisher figshare collection journal article supplement (https://gsapubs.figshare.com/ndownloader/files/38910639)
Supplement: Supplementary file 1 [file 38910639]

## Sheet: compilation
Sample	Reference	Pressure (Gpa)	Temp	Melt Fraction	SiO2	TiO2	Al2O3	Cr2O3	FeO	MnO	MgO	CaO	Na2O	K2O	P2O5	Total		SiO2	TiO2	Al2O3	Cr2O3	FeO	MnO	MgO	CaO	Na2O	K2O	P2O5	Total	Fo	CaTs	Qz
M5-40	[1] Lambart et al. 2013	2	1250	1.1	53.1	1.3	18.6	0.01	7.3	0.09	4.2	4.2	6.5	4.8		100.1		53.047	1.2987	18.5814	0.00999001	7.29271	0.0899101	4.1958	4.1958	6.49351	4.7952	0	100	17.177	77.3141	5.50889
M5-40	[1] Lambart et al. 2013	2	1275	2.3	50.4	1.7	17.1	0.01	10	0.1	6.1	5.8	6.5	2.5		100.21		50.2944	1.69644	17.0642	0.00997904	9.97904	0.0997904	6.08722	5.78785	6.48638	2.49476	0	100	24.8301	71.2292	3.9407
M5-40	[1] Lambart et al. 2013	2	1300	3.6	49.1	1.7	16.3	0.01	11.5	0.18	7.5	7.1	5	1.6		99.99		49.1049	1.70017	16.3016	0.010001	11.5012	0.180018	7.50075	7.10071	5.0005	1.60016	0	100	30.7103	60.7931	8.49655
M5-40	[1] Lambart et al. 2013	2	1350	19	47	1.4	16.5	0.02	12.3	0.2	9.9	9.3	3.2	0.24		100.06		46.9718	1.39916	16.4901	0.019988	12.2926	0.19988	9.89406	9.29442	3.19808	0.239856	0	100	37.89	49.38	12.73
M5-40	[1] Lambart et al. 2013	2	1375	25	47.3	1.1	15.7	0.03	12.3	0.2	10.4	9.2	3.5	0.26		99.99		47.3047	1.10011	15.7016	0.030003	12.3012	0.20002	10.401	9.20092	3.50035	0.260026	0	100	39.3228	49.6266	11.0505
M5-40	[1] Lambart et al. 2013	2	1375	27	47.3	1.1	15.6	0.03	12.2	0.23	10.6	9.6	3.1	0.23		99.99		47.3047	1.10011	15.6016	0.030003	12.2012	0.230023	10.6011	9.60096	3.10031	0.230023	0	100	39.6358	48.0177	12.3465
M5-40	[1] Lambart et al. 2013	2	1400	69	47.5	0.7	14.7	0.07	9.9	0.2	13.7	11.1	2	0.1		99.97		47.5143	0.70021	14.7044	0.070021	9.90297	0.20006	13.7041	11.1033	2.0006	0.10003	0	100	43.9783	42.0111	14.0106
M5-40	[1] Lambart et al. 2013	2.5	1375	2.6	48.3	2.08	15.8	0	12	0.19	7.3	7	5.5	2.2		100.37		48.1219	2.07233	15.7418	0	11.9558	0.1893	7.27309	6.9742	5.47973	2.19189	0	100	30.2175	66.5588	3.2237
M5-40	[1] Lambart et al. 2013	2.5	1400	4.5	48.7	1.9	14.6	0.01	12.2	0.19	8.4	8.4	4.2	1.4		100		48.7	1.9	14.6	0.01	12.2	0.19	8.4	8.4	4.2	1.4	0	100	33.2487	57.4506	9.30077
M5-40	[1] Lambart et al. 2013	2.5	1425	14	47.2	1.7	15.3	0.02	11.9	0.17	10.3	9.8	3.2	0.4		99.99		47.2047	1.70017	15.3015	0.020002	11.9012	0.170017	10.301	9.80098	3.20032	0.40004	0	100	37.8021	50.4587	11.7392
M5-40	[1] Lambart et al. 2013	2.5	1425	20	47.9	1.4	15.1	0.03	11.3	0.25	10.8	9.9	3.1	0.34		100.12		47.8426	1.39832	15.0819	0.029964	11.2865	0.2497	10.7871	9.88813	3.09628	0.339592	0	100	38.3023	48.9726	12.7251
M5-40	[1] Lambart et al. 2013	2.5	1450	76	47.7	0.6	13.8	0.11	9.3	0.23	14.6	11.9	1.7	0.07		100.01		47.6952	0.59994	13.7986	0.109989	9.29907	0.229977	14.5985	11.8988	1.69983	0.069993	0	100	45.5384	40.3934	14.0683
M7-16	[1] Lambart et al. 2013	2	1300	7	38.2	3.3	10.7	0.02	25	0.39	8.8	10.7	2.5	0.48		100.09		38.1657	3.29703	10.6904	0.019982	24.9775	0.389649	8.79209	10.6904	2.49775	0.479568	0	100	55.0887	48.5777	-3.66636
M7-16	[1] Lambart et al. 2013	2	1300	16	40.4	1.7	12.7	0.03	23.4	0.35	8.8	11	1.6	0.13		100.11		40.3556	1.69813	12.686	0.029967	23.3743	0.349615	8.79033	10.9879	1.59824	0.129857	0	100	53.1891	41.3802	5.43078
M7-16	[1] Lambart et al. 2013	2	1325	33	41.4	1.4	13.2	0.01	21.7	0.4	9.6	11.1	1.2	0.07		100.08		41.3669	1.39888	13.1894	0.00999201	21.6827	0.39968	9.59233	11.0911	1.19904	0.069944	0	100	52.3681	38.7694	8.86253
M7-16	[1] Lambart et al. 2013	2	1350	50.7	42.6	1.2	13.6	0.02	18.5	0.4	10.6	12	1.1	0.06		100.08		42.5659	1.19904	13.5891	0.019984	18.4852	0.39968	10.5915	11.9904	1.09912	0.059952	0	100	50.1524	39.7221	10.1255
M7-16	[1] Lambart et al. 2013	2.5	1350	8	36.7	2.7	9.3	0	25.5	0.35	9.9	12.6	2.7	0.25		100		36.7	2.7	9.3	0	25.5	0.35	9.9	12.6	2.7	0.25	0	100	63.7193	51.8617	-15.581
M7-16	[1] Lambart et al. 2013	2.5	1400	22	39.1	2.4	10.4	0.01	22.2	0.4	10.6	12.8	1.9	0.18		99.99		39.1039	2.40024	10.401	0.010001	22.2022	0.40004	10.6011	12.8013	1.90019	0.180018	0	100	57.8389	46.1107	-3.94958
M7-16	[1] Lambart et al. 2013	2.5	1425	65	42.3	1	14.3	0.05	16.9	0.3	10.9	13.2	1.1	0.06		100.11		42.2535	0.998901	14.2843	0.0499451	16.8814	0.29967	10.888	13.1855	1.09879	0.0599341	0	100	48.9638	42.7997	8.23648
MIX1G	[2] Hirschmann et al. 2003	2	1400	26	45.1	2	16.2	0.03	10.9	0.16	11.1	9.98	2.6	0.08	0.05	98.2		45.9267	2.03666	16.4969	0.0305499	11.0998	0.162933	11.3035	10.1629	2.64766	0.0814664	0.0509165	100	38.8176	48.2222	12.9602
MIX1G	[2] Hirschmann et al. 2003	2	1375	14	44.4	2.3	16.4		12.81	0.1	10.6	9.3	3.78	0.12	0.03	99.84		44.4712	2.30369	16.4263	0	12.8305	0.10016	10.617	9.3149	3.78606	0.120192	0.0300481	100	39.61	53.3664	7.02358
MIX1G	[2] Hirschmann et al. 2003	2.5	1500	67	45.2	1.3	15.2	0.05	9.1	0.17	15	11.2	1.91	0.05	0.02	99.2		45.5645	1.31048	15.3226	0.0504032	9.17339	0.171371	15.121	11.2903	1.9254	0.0504032	0.0201613	100	45.6356	43.1229	11.2416
MIX1G	[2] Hirschmann et al. 2003	2.5	1475	28	42.7	1.87	14.54		12	0.17	13.54	10.3	3.04	0.09	0.04	98.29		43.4429	1.90253	14.793	0	12.2088	0.172958	13.7756	10.4792	3.09289	0.0915658	0.0406959	100	46.7934	49.0985	4.1081
MIX1G	[2] Hirschmann et al. 2003	2.5	1455	21	43.1	2.58	14.2		13.6	0.15	12.5	10.2	3.72	0.08	0.06	100.19		43.0183	2.57511	14.1731	0	13.5742	0.149716	12.4763	10.1807	3.71295	0.0798483	0.0598862	100	45.1611	53.0397	1.79929
77SL-582	[3] Keshav et al. 2004	2	1410	87.11	45.64	0.89	14.67	0.09	11.51	0.18	14.08	10.2	2.02	0.73		100.01		45.6354	0.889911	14.6685	0.089991	11.5088	0.179982	14.0786	10.199	2.0198	0.729927	0	100	47.2589	42.9069	9.83422
77SL-582	[3] Keshav et al. 2004	2	1385	69.14	45.01	1.07	14.67	0.09	11.51	0.18	14.08	10.2	2.02	0.73		99.56		45.2089	1.07473	14.7348	0.0903978	11.5609	0.180796	14.1422	10.2451	2.02893	0.733226	0	100	47.3102	43.4473	9.24253
77SL-582	[3] Keshav et al. 2004	2	1360	34.83	44.43	1.43	13.97	0.09	12.83	0.19	13.39	9.91	2.17	0.89		99.3		44.7432	1.44008	14.0685	0.0906344	12.9204	0.191339	13.4844	9.97986	2.1853	0.896274	0	100	47.56	44.5341	7.9059
77SL-582	[3] Keshav et al. 2004	2	1340	21.34	44.12	1.51	13.18	0.08	13.37	0.19	12.94	9.69	2.58	1.02		98.68		44.7102	1.5302	13.3563	0.0810701	13.5488	0.192542	13.1131	9.81962	2.61451	1.03364	0	100	47.8218	46.7439	5.43436
77SL-582	[3] Keshav et al. 2004	2.5	1460	93.95	45.49	0.87	15.61	0.12	9.27	0.18	15.81	10.34	1.1	0.41		99.2		45.8569	0.877016	15.7359	0.120968	9.34476	0.181452	15.9375	10.4234	1.10887	0.413306	0	100	47.7262	38.07	14.2038
77SL-582	[3] Keshav et al. 2004	2.5	1430	76.21	44.71	1.04	14.7	0.08	12.09	0.21	14.67	10.17	2.08	0.69		100.44		44.5141	1.03544	14.6356	0.0796495	12.037	0.20908	14.6057	10.1254	2.07089	0.686977	0	100	49.1999	42.9903	7.80984
77SL-582	[3] Keshav et al. 2004	2.5	1400	42.24	44.14	1.19	13.61	0.08	13.01	0.19	13.69	9.94	2.58	1.01		99.44		44.3886	1.1967	13.6866	0.0804505	13.0833	0.19107	13.7671	9.99598	2.59453	1.01569	0	100	49.1593	46.5545	4.28621
77SL-582	[3] Keshav et al. 2004	2.5	1370	18.08	43.82	1.37	12.94	0.06	13.91	0.19	12.87	9.85	2.89	1.27		99.17		44.1868	1.38147	13.0483	0.0605022	14.0264	0.19159	12.9777	9.93244	2.91419	1.28063	0	100	48.8832	49.461	1.65582
OCA2 (hydrous)	[4] Medard et al. 2006	1	1350	77.2	46.2	1.5	9.46		9.72		13.8	17.6	1.16	0.55		99.99		46.2046	1.50015	9.46095	0	9.72097	0	13.8014	17.6018	1.16012	0.550055	0	100	45.1148	52.9535	1.93164
OCA2 (hydrous)	[4] Medard et al. 2006	1	1350	77.5	46.2	1.43	9.44		9.5		13.6	17.8	1.33	0.53		99.83		46.2787	1.43244	9.45608	0	9.51618	0	13.6232	17.8303	1.33226	0.530903	0	100	44.0913	55.747	0.16173
OCA2 (hydrous)	[4] Medard et al. 2006	1	1325	66.1	45.3	1.66	10.7		10.2		12.5	17.6	1.34	0.63		99.93		45.3317	1.66116	10.7075	0	10.2071	0	12.5088	17.6123	1.34094	0.630441	0	100	40.8772	58.6309	0.491893
OCA2 (hydrous)	[4] Medard et al. 2006	1	1300	62.8	45.3	1.6	10.9		10.5		12.3	17.2	1.36	0.65		99.81		45.3862	1.60305	10.9207	0	10.52	0	12.3234	17.2327	1.36259	0.651237	0	100	41.0136	57.4151	1.57134
OCA2 (hydrous)	[4] Medard et al. 2006	1	1300	55.8	44.8	1.73	11.8		10.8		11.5	17	1.55	0.76		99.94		44.8269	1.73104	11.8071	0	10.8065	0	11.5069	17.0102	1.55093	0.760456	0	100	38.4658	60.9815	0.552701
OCA2 (hydrous)	[4] Medard et al. 2006	1	1300	35	43.9	2.03	13.8		11.8		9.29	15.6	2.42	1.1		99.94		43.9264	2.03122	13.8083	0	11.8071	0	9.29558	15.6094	2.42145	1.10066	0	100	32.8668	69.1278	-1.99455
OCA2 (hydrous)	[4] Medard et al. 2006	1	1275	45.3	44.3	2.03	12.9		11.2		10.3	16.3	1.9	0.88		99.81		44.3843	2.03386	12.9246	0	11.2213	0	10.3196	16.331	1.90362	0.881675	0	100	34.8551	64.5694	0.575503
OCA2 (hydrous)	[4] Medard et al. 2006	1	1225	43.4	44.1	2.08	13.3		11.5		10.2	16.1	1.8	0.93		100.01		44.0956	2.07979	13.2987	0	11.4989	0	10.199	16.0984	1.79982	0.929907	0	100	35.2222	63.2921	1.48572
OCA2 (hydrous)	[4] Medard et al. 2006	1	1225	39.3	44.4	2.11	14		11.5		9.69	15.3	1.95	1.01		99.96		44.4178	2.11084	14.0056	0	11.5046	0	9.69388	15.3061	1.95078	1.0104	0	100	33.8322	62.5646	3.60323
OCA2 (hydrous)	[5] Sorbadere et al. 2013	1	1150	10	47.9	2.2	18.4		8.5	0.18	5.6	7.9	3.2	3.02		96.9		49.4324	2.27038	18.9886	0	8.77193	0.185759	5.77915	8.15273	3.30237	3.11662	0	100	22.9303	62.7708	14.2989
OCA2 (hydrous)	[5] Sorbadere et al. 2013	1	1200	30	44.5	2.3	14.1		10.1	0.14	9.5	13	2.2	1.37		97.21		45.7772	2.36601	14.5047	0	10.3899	0.144018	9.77266	13.3731	2.26314	1.40932	0	100	32.3493	60.3847	7.26594
OCA2 (hydrous)	[5] Sorbadere et al. 2013	1	1300	59	45.3	1.8	11		10.1	0.15	12.2	16.1	1.4	0.69		98.74		45.8781	1.82297	11.1404	0	10.2289	0.151914	12.3557	16.3054	1.41787	0.698805	0	100	40.0532	54.8796	5.06719

## Sheet: references
[1] Lambart, S., Laporte, D., and Schiano, P., 2013, Markers of the pyroxenite contribution in the major-element compositions of oceanic basalts: Review of the experimental constraints: Lithos, v. 160–161, p. 14–36, doi:10.1016/j.lithos.2012.11.018.
[2] ﻿Hirschmann, M.M., Kogiso, T., Baker, M.B., and Stolper, E.M., 2003, Alkalic magmas generated by partial melting of garnet pyroxenite: Geology, v. 31, p. 481–484, doi:10.1130/0091-7613(2003)031<0481:AMGBPM>2.0.CO;2.
[3] Keshav, S., Gudfinnsson, G.H., Sen, G., and Fei, Y., 2004, High-pressure melting experiments on garnet clinopyroxenite and the alkalic to tholeiitic transition in ocean-island basalts: Earth and Planetary Science Letters, v. 223, p. 365–379, doi:https://doi.org/10.1016/j.epsl.2004.04.029.
[4] Médard, E., Schmidt, M.W., Schiano, P., and Ottolini, L., 2006, Melting of Amphibole-bearing Wehrlites: an Experimental Study on the Origin of Ultra-calcic Nepheline-normative Melts: Journal of Petrology, v. 47, p. 481–504, doi:10.1093/petrology/egi083.
[5] Sorbadere, F., Médard, E., Laporte, D., and Schiano, P., 2013, Experimental melting of hydrous peridotite–pyroxenite mixed sources: Constraints on the genesis of silica-undersaturated magmas beneath volcanic arcs: Earth and Planetary Science Letters, v. 384, p. 42–56, doi:https://doi.org/10.1016/j.epsl.2013.09.026.

## Sheet: G50929
Bowman, E.E., and Ducea, M.N., 2023, Pyroxenite melting at subduction zones: Geology, https://doi.org/10.1130/G50929.1
